# Supplementary material for: Network pharmacology and RNA sequencing studies on triterpenoid saponins from Bupleurum chinense for the treatment of breast cancer
Source: Royal Society of Chemistry journal article supplement (doi:10.1039/c9ra08970e), 2019-01-01
Supplement: c9ra08970e1.pdf [file c9ra08970e1.pdf]

## Electronic Supplementary information

### The network pharmacology and RNA sequencing studies on Triterpenoid saponins from *Bupleurum Chinese* for the treatment of breast cancer

Danqi Li,<sup>a</sup> Da Liu,<sup>a,b</sup> Dandan Yue,<sup>a,c</sup> Pinyi Gao,<sup>a,b</sup> Cheng Du,<sup>\*d</sup> Xuegui Liu,<sup>\*a,b</sup> Lixin  
Zhang<sup>\*a</sup>

<sup>a</sup> Institute of Functional Molecules, Liaoning Province Key Laboratory of Green Functional Molecular Design and Development, Shenyang key Laboratory of targeted pesticides, Shenyang University of Chemical Technology, Shenyang 110142, Liaoning, PR China

<sup>b</sup> College of Pharmaceutical and Biological Engineering, Shenyang University of Chemical Technology, Shenyang 110142, Liaoning, PR China

<sup>c</sup> College of Applied Chemistry, Shenyang university of chemical technology, Shenyang 110142, Liaoning, PR China

<sup>d</sup> Department of Oncology, General Hospital of Northern Theater Command, Shenyang 110840, Liaoning, PR China

\*Correspondence to: Cheng Du, Xuegui Liu, and Lixin Zhang, College of Pharmaceutical and Biological Engineering, Shenyang University of Chemical Technology, Shenyang 110142, Liaoning, PR China. Institute of Functional Molecules, Shenyang University of Chemical Technology, Shenyang 110142, Liaoning, PR China.

E-mail: dc1115010@sina.com; liuxuegui@syuct.edu.cn; zhanglixin@syuct.edu.cn. Tel: +86-24-89385213, Fax: +86-24-89385213

## **List of supplementary content**

Figure S1  $^{13}\text{C}$ -NMR spectrum (100 MHz, pyridine- $d_5$ ) of saikosaponin-d

Figure S2 HR-ESI-MS spectrum of saikosaponin-d

Table S1 The structures of compounds in the article

Table S2 Relevant information of target proteins and network features in the C-T network

Table S3 targets proteins and related signaling pathways

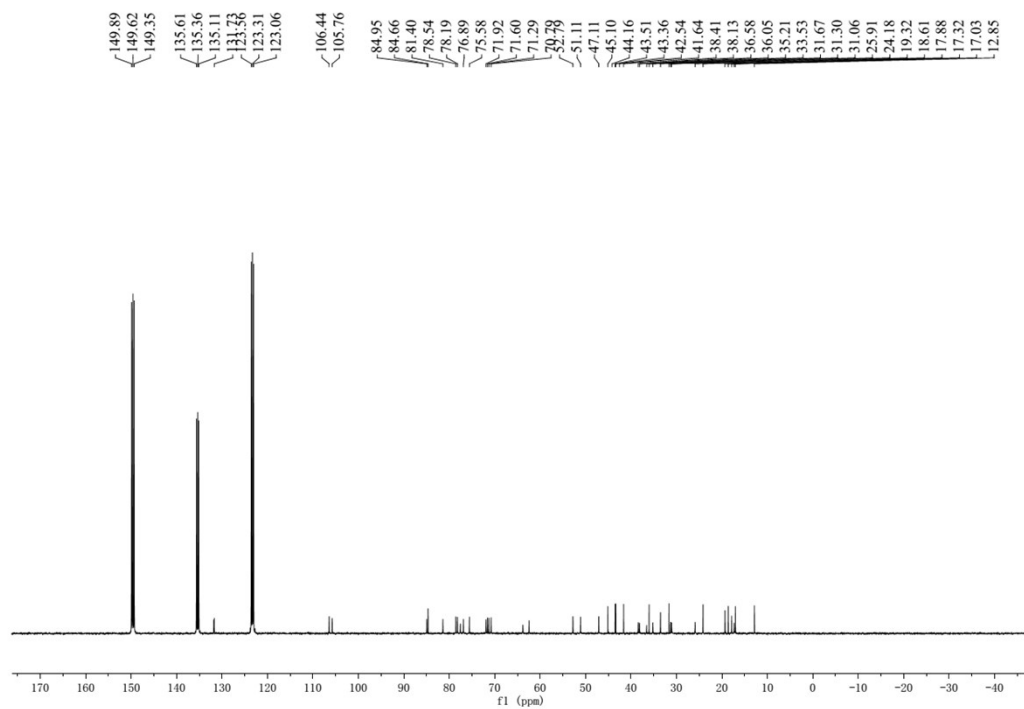

Figure S1 <sup>13</sup>C-NMR spectrum (100 MHz, pyridine-*d*<sub>5</sub>) of saikosaponin-d

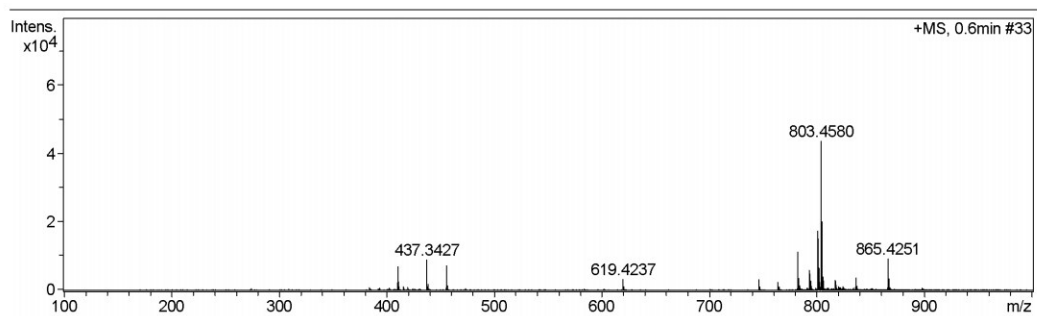

Figure S2 HR-ESI-MS spectrum of saikosaponin-d

**Table S1 The structures of compounds in the article**

| Number | Name            | Structure                                                                            |
|--------|-----------------|--------------------------------------------------------------------------------------|
| 1      | saikogenin F    | 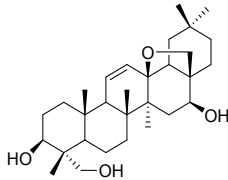   |
| 2      | saikogenin G    |  |
| 3      | prosaikogenin G |  |
| 4      | prosaikogenin F |  |
| 5      | saikosaponin-a  |  |

|    |                            |                                                                                                                                                                                                                                                                                                                                                              |
|----|----------------------------|--------------------------------------------------------------------------------------------------------------------------------------------------------------------------------------------------------------------------------------------------------------------------------------------------------------------------------------------------------------|
| 6  | 2''-O-acetylsaikosaponin-a | 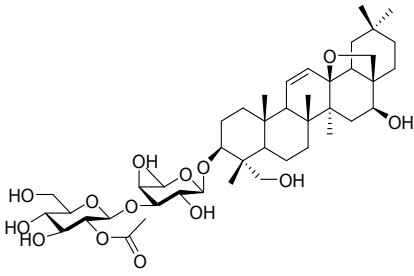 <p>The structure shows a saikoside aglycone (saikosaponin-a) with a disaccharide chain attached to the C-3 position. The disaccharide consists of a glucose unit linked to a galactose unit. An acetyl group is attached to the C-2'' position of the galactose unit.</p> |
| 7  | 3''-O-acetylsaikosaponin-a |  <p>The structure shows a saikoside aglycone with a disaccharide chain attached to the C-3 position. The disaccharide consists of a glucose unit linked to a galactose unit. An acetyl group is attached to the C-3'' position of the galactose unit.</p>                  |
| 8  | 4''-O-acetylsaikosaponin-a |  <p>The structure shows a saikoside aglycone with a disaccharide chain attached to the C-3 position. The disaccharide consists of a glucose unit linked to a galactose unit. An acetyl group is attached to the C-4'' position of the galactose unit.</p>                 |
| 9  | 6''-O-acetylsaikosaponin-a |  <p>The structure shows a saikoside aglycone with a disaccharide chain attached to the C-3 position. The disaccharide consists of a glucose unit linked to a galactose unit. An acetyl group is attached to the C-6'' position of the galactose unit.</p>                |
| 10 | 23-O-acetylsaikosaponin-a  |  <p>The structure shows a saikoside aglycone with a disaccharide chain attached to the C-3 position. The disaccharide consists of a glucose unit linked to a galactose unit. An acetyl group is attached to the C-23 position of the saikoside aglycone.</p>             |

|    |                                            |                                                                                                                                                                                                                                                                                                                                                                                                                                                                                                                                                              |
|----|--------------------------------------------|--------------------------------------------------------------------------------------------------------------------------------------------------------------------------------------------------------------------------------------------------------------------------------------------------------------------------------------------------------------------------------------------------------------------------------------------------------------------------------------------------------------------------------------------------------------|
| 11 | 2'', 3''- <i>O</i> -diacetylsaikosaponin-a | 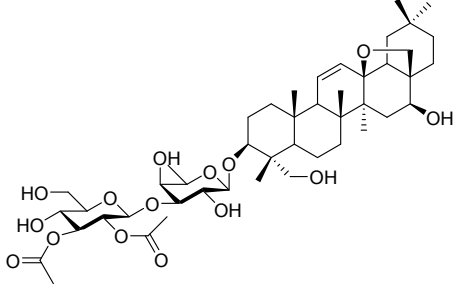 <p>The structure shows a complex steroid nucleus with a pentacyclic core. It features a diacetyl sugar chain attached to the C-3'' position. The sugar chain consists of a glucose unit linked to a galactose unit, which is further linked to a rhamnose unit. The 2'' and 3'' positions of the rhamnose unit are acetylated. The steroid nucleus has several methyl groups and hydroxyl groups, including a double bond in the B-ring and a hydroxyl group at C-14.</p> |
| 12 | 3'', 4''- <i>O</i> -diacetylsaikosaponin-a |  <p>The structure is similar to the previous one, but the acetyl groups are attached to the 3'' and 4'' positions of the rhamnose unit. The rest of the steroid nucleus and sugar chain are identical.</p>                                                                                                                                                                                                                                                                 |
| 13 | 3'', 6''- <i>O</i> -diacetylsaikosaponin-a |  <p>The structure is similar to the previous ones, but the acetyl groups are attached to the 3'' and 6'' positions of the rhamnose unit. The rest of the steroid nucleus and sugar chain are identical.</p>                                                                                                                                                                                                                                                               |
| 14 | saikosaponin-d                             |  <p>The structure shows the steroid nucleus and sugar chain of saikosaponin-d. It features a diacetyl sugar chain attached to the C-3'' position, consisting of a glucose unit linked to a galactose unit, which is further linked to a rhamnose unit. The 2'' and 3'' positions of the rhamnose unit are acetylated. The steroid nucleus has several methyl groups and hydroxyl groups, including a double bond in the B-ring and a hydroxyl group at C-14.</p>         |

|    |                                  |                                                                                                                                                                                                                                                                                                                                               |
|----|----------------------------------|-----------------------------------------------------------------------------------------------------------------------------------------------------------------------------------------------------------------------------------------------------------------------------------------------------------------------------------------------|
| 15 | 2''-O-acetylsaikosaponin-d       | 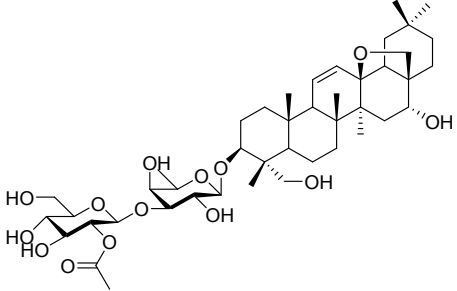 <p>The structure shows a saikosaponin-d aglycone with a disaccharide chain at the 2'' position. The disaccharide consists of a glucose unit linked to a galactose unit. An acetyl group is attached to the 2'' carbon of the galactose unit.</p>           |
| 16 | 3''-O-acetylsaikosaponin-d       |  <p>The structure shows a saikosaponin-d aglycone with a disaccharide chain at the 3'' position. The disaccharide consists of a glucose unit linked to a galactose unit. An acetyl group is attached to the 3'' carbon of the galactose unit.</p>           |
| 17 | 6''-O-acetylsaikosaponin-d       |  <p>The structure shows a saikosaponin-d aglycone with a disaccharide chain at the 6'' position. The disaccharide consists of a glucose unit linked to a galactose unit. An acetyl group is attached to the 6'' carbon of the galactose unit.</p>          |
| 18 | 2'',3''-O-diacetylsaikosaponin-d |  <p>The structure shows a saikosaponin-d aglycone with a disaccharide chain at the 2'' position. The disaccharide consists of a glucose unit linked to a galactose unit. Acetyl groups are attached to the 2'' and 3'' carbons of the galactose unit.</p> |
| 19 | 3'',4''-O-diacetylsaikosaponin-d |  <p>The structure shows a saikosaponin-d aglycone with a disaccharide chain at the 3'' position. The disaccharide consists of a glucose unit linked to a galactose unit. Acetyl groups are attached to the 3'' and 4'' carbons of the galactose unit.</p> |



|    |                                         |                                                                                      |
|----|-----------------------------------------|--------------------------------------------------------------------------------------|
| 20 | 3",6"- <i>O</i> -diacetylsaikosaponin-d | 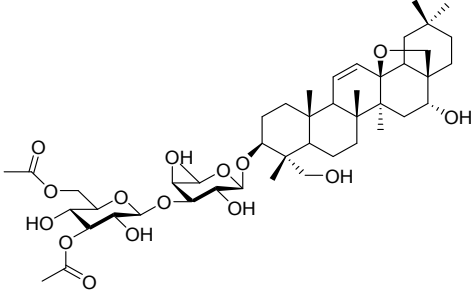   |
| 21 | 4",6"- <i>O</i> -diacetylsaikosaponin-d |    |
| 22 | saikosaponins-e                         |   |
| 23 | 3"- <i>O</i> -acetylsaikosaponin-e      |  |
| 24 | 6"- <i>O</i> -acetylsaikosaponin-e      |  |

|    |                                                                                                                                             |                                                                                      |
|----|---------------------------------------------------------------------------------------------------------------------------------------------|--------------------------------------------------------------------------------------|
| 25 | 23-hydroxy-13 $\beta$ , 28 $\beta$ -epoxy-olean-11-ene-16-one 3-O- $\beta$ -D-glucopyranosyl-(1 $\rightarrow$ 3)- $\beta$ -D-fucopyranoside | 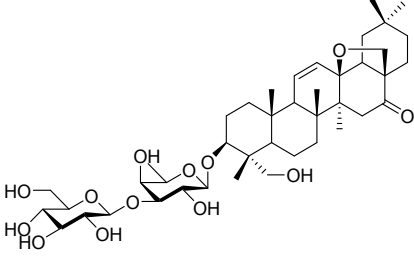   |
| 26 | saikosaponin-c                                                                                                                              |    |
| 27 | rotundioside F                                                                                                                              |   |
| 28 | saikosaponin-i                                                                                                                              |  |
| 29 | bupleuroside I                                                                                                                              |  |

|    |                                              |                                                                                                                                                                                                                                                                                                                                                                                                                         |
|----|----------------------------------------------|-------------------------------------------------------------------------------------------------------------------------------------------------------------------------------------------------------------------------------------------------------------------------------------------------------------------------------------------------------------------------------------------------------------------------|
| 30 | saikosaponin-b <sub>3</sub>                  | 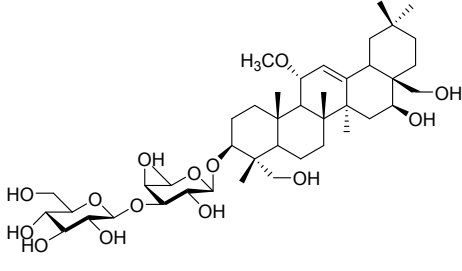 <p>The structure shows a complex steroid nucleus with a methoxy group (H<sub>3</sub>CO) at C-13, a double bond at C-14, and hydroxyl groups at C-3, C-14, C-15, and C-20. It is linked via a glycosidic bond to a disaccharide chain consisting of a glucose unit at the C-3 position and a galactose unit at the C-14 position.</p> |
| 31 | 6''-O-acetylsaikosaponin-b <sub>3</sub>      |  <p>This structure is identical to saikosaponin-b<sub>3</sub> but features an acetyl group (CH<sub>3</sub>CO) attached to the 6''-OH position of the galactose unit in the disaccharide chain.</p>                                                                                                                                    |
| 32 | saikosaponin-b <sub>4</sub>                  |  <p>The structure is identical to saikosaponin-b<sub>3</sub>, showing the same steroid nucleus and disaccharide chain (glucose at C-3, galactose at C-14).</p>                                                                                                                                                                       |
| 33 | 3'', 4''-diacetylsaikosaponin-b <sub>4</sub> |  <p>This structure is identical to saikosaponin-b<sub>4</sub> but has acetyl groups (CH<sub>3</sub>CO) attached to the 3''-OH and 4''-OH positions of the galactose unit in the disaccharide chain.</p>                                                                                                                             |
| 34 | saikosaponin-w                               |  <p>The structure is identical to saikosaponin-b<sub>3</sub> but features a hydrazide group (H<sub>2</sub>N-CO-NH) at the C-13 position instead of a methoxy group.</p>                                                                                                                                                             |

|    |                                    |                                                                                      |
|----|------------------------------------|--------------------------------------------------------------------------------------|
| 35 | bupleuroside III                   | 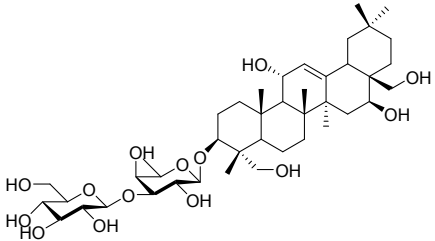   |
| 36 | bupleuroside VI                    |    |
| 37 | bupleuroside XIII                  |    |
| 38 | saikosaponin-t                     |  |
| 39 | saikosaponin-f                     |  |
| 40 | 11 $\alpha$ -methoxysaikosaponin-f |  |

|    |                 |                                                                                      |
|----|-----------------|--------------------------------------------------------------------------------------|
| 41 | saikosaponin-g  | 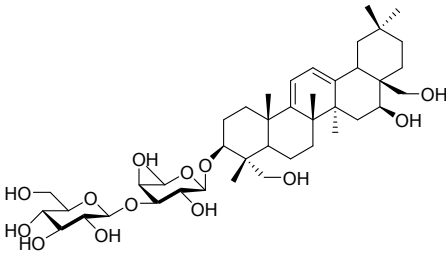   |
| 42 | prosaikogenin H |    |
| 43 | saikogenin D    |    |
| 44 | saikogenin A    |   |
| 45 | prosaikogenin D |  |
| 46 | prosaikogenin A |  |

|    |                                         |                                                                                                                                                                                                                                                                                                               |
|----|-----------------------------------------|---------------------------------------------------------------------------------------------------------------------------------------------------------------------------------------------------------------------------------------------------------------------------------------------------------------|
| 47 | saikosaponin-b <sub>1</sub>             | 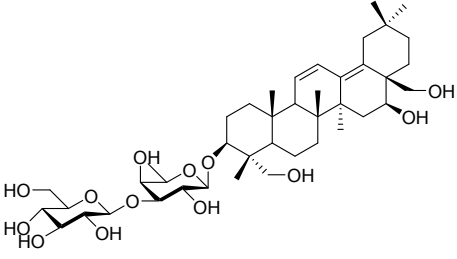 <p>The structure shows a complex steroid nucleus with multiple hydroxyl groups and methyl substituents. It is linked via a glycosidic bond to a disaccharide chain consisting of a glucose unit and a galactose unit.</p>  |
| 48 | 6''-O-acetylsaikosaponin-b <sub>1</sub> |  <p>This structure is identical to saikosaponin-b<sub>1</sub> but features an acetyl group (-COCH<sub>3</sub>) attached to the 6'' position of the galactose unit in the disaccharide chain.</p>                            |
| 49 | saikosaponin-b <sub>2</sub>             |  <p>The structure shows a complex steroid nucleus with multiple hydroxyl groups and methyl substituents. It is linked via a glycosidic bond to a disaccharide chain consisting of a glucose unit and a galactose unit.</p> |
| 50 | 2''-O-acetylsaikosaponin-b <sub>2</sub> |  <p>This structure is identical to saikosaponin-b<sub>2</sub> but features an acetyl group (-COCH<sub>3</sub>) attached to the 2'' position of the galactose unit in the disaccharide chain.</p>                          |
| 51 | 3''-O-acetylsaikosaponin-b <sub>2</sub> |  <p>This structure is identical to saikosaponin-b<sub>2</sub> but features an acetyl group (-COCH<sub>3</sub>) attached to the 3'' position of the galactose unit in the disaccharide chain.</p>                          |

|    |                                                |                                                                                                                                                                                                                                                                                      |
|----|------------------------------------------------|--------------------------------------------------------------------------------------------------------------------------------------------------------------------------------------------------------------------------------------------------------------------------------------|
| 52 | 21 $\beta$ -hydroxysaikosaponin-b <sub>2</sub> | 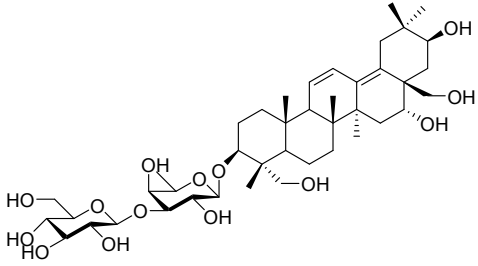 <p>The structure shows a complex steroid nucleus with a hydroxyl group at C-21. It is linked via a glycosidic bond to a disaccharide chain consisting of a glucose unit and a galactose unit.</p> |
| 53 | 3'',6''-O-acetylsaikosaponin-b <sub>2</sub>    |  <p>The structure is similar to 21β-hydroxysaikosaponin-b<sub>2</sub> but features two acetyl groups attached to the 3'' and 6'' positions of the galactose unit in the disaccharide chain.</p>    |
| 54 | saikosaponin-h                                 |  <p>The structure features a steroid nucleus with a complex branched sugar chain attached at C-3. The sugar chain includes multiple glucose and galactose units.</p>                              |
| 55 | saikosaponin-k                                 |  <p>The structure shows a steroid nucleus with a complex branched sugar chain. It includes a galactose unit at the top of the chain and several glucose units below it.</p>                      |
| 56 | saikosaponin-l                                 |  <p>The structure is similar to saikosaponin-k, featuring a steroid nucleus with a complex branched sugar chain composed of galactose and glucose units.</p>                                     |

|    |                   |                                                                                                                                                                                                                                                                                                                                                                                                                                                                                                                                           |
|----|-------------------|-------------------------------------------------------------------------------------------------------------------------------------------------------------------------------------------------------------------------------------------------------------------------------------------------------------------------------------------------------------------------------------------------------------------------------------------------------------------------------------------------------------------------------------------|
| 57 | saikosaponin-m    | 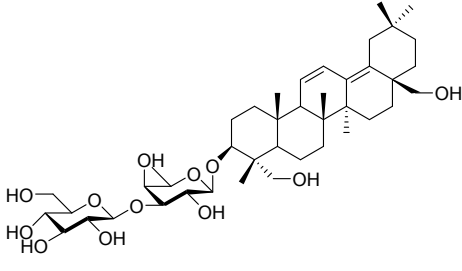 <p>The structure of saikosaponin-m consists of a steroid nucleus with a double bond at C5, a hydroxyl group at C3, and a methyl group at C10. It is linked via an ether bond at C13 to a branched chain of three pyranose rings. The terminal ring is a galactose unit with hydroxyl groups at C2, C3, and C6.</p>                                                                                                                                     |
| 58 | saikosaponin-s    |  <p>The structure of saikosaponin-s features a steroid nucleus with a double bond at C5, hydroxyl groups at C3 and C14, and a methyl group at C10. It is linked via an ether bond at C13 to a branched chain of three pyranose rings. The terminal ring is a galactose unit with hydroxyl groups at C2, C3, and C6.</p>                                                                                                                                 |
| 59 | saikosaponin-v    |  <p>The structure of saikosaponin-v has a steroid nucleus with a double bond at C5, hydroxyl groups at C3 and C14, and a methyl group at C10. It is linked via an ether bond at C13 to a branched chain of three pyranose rings. The terminal ring is a galactose unit with hydroxyl groups at C2, C3, and C6. Additionally, there is a side chain at C17 consisting of a propanoic acid moiety linked to a dihydroxyethyl group.</p>                  |
| 60 | scorzoneraside A  |  <p>The structure of scorzoneraside A features a steroid nucleus with a double bond at C5, hydroxyl groups at C3 and C14, and a methyl group at C10. It is linked via an ether bond at C13 to a branched chain of three pyranose rings. The terminal ring is a galactose unit with hydroxyl groups at C2, C3, and C6. A side chain at C17 consists of a propanoic acid moiety linked to a dihydroxyethyl group.</p>                                   |
| 61 | scorzonerosides B |  <p>The structure of scorzonerosides B is similar to scorzoneraside A, featuring a steroid nucleus with a double bond at C5, hydroxyl groups at C3 and C14, and a methyl group at C10. It is linked via an ether bond at C13 to a branched chain of three pyranose rings. The terminal ring is a galactose unit with hydroxyl groups at C2, C3, and C6. A side chain at C17 consists of a propanoic acid moiety linked to a dihydroxyethyl group.</p> |



|    |                   |                                                                                                                                                                                                                                                                                                                                                                                                                                                                                                                                                                                                                                                             |
|----|-------------------|-------------------------------------------------------------------------------------------------------------------------------------------------------------------------------------------------------------------------------------------------------------------------------------------------------------------------------------------------------------------------------------------------------------------------------------------------------------------------------------------------------------------------------------------------------------------------------------------------------------------------------------------------------------|
| 62 | scorzonerosides C | 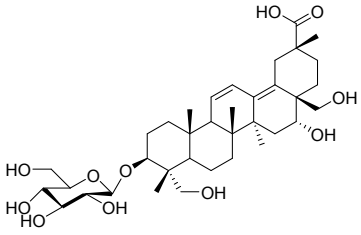 <p>The chemical structure of scorzonerosides C is a complex polycyclic molecule. It features a pentacyclic core consisting of a decalin system fused to a six-membered ring with a double bond, which is further fused to a six-membered ring containing a carboxylic acid group (-COOH). A side chain is attached to the decalin system, ending in a glucose moiety. The glucose is shown in its cyclic pyranose form with multiple hydroxyl groups (-OH) at various positions. Stereochemistry is indicated with wedged and dashed bonds throughout the structure.</p> |
|----|-------------------|-------------------------------------------------------------------------------------------------------------------------------------------------------------------------------------------------------------------------------------------------------------------------------------------------------------------------------------------------------------------------------------------------------------------------------------------------------------------------------------------------------------------------------------------------------------------------------------------------------------------------------------------------------------|

**Table S2 Relevant information of target proteins in the article and network features in the C-T network**

| NO. | Protein names                         | Gene names | Protein codes | Resolution | Degrees of target proteins | Betweenness of target proteins |
|-----|---------------------------------------|------------|---------------|------------|----------------------------|--------------------------------|
| 1   | Insulin-like growth factor 1 receptor | IGF1R      | 3NW7          | 2.11 Å     | 1                          | 0                              |
| 2   | Heat shock protein HSP 90-alpha       | HSP90AA1   | 4YKZ          | 1.85 Å     | 2                          | 9.39E-04                       |
| 3   | Phosphatidylinositol 4,5-             | PIK3CA     | 4JPS          | 2.2 Å      | 1                          | 0                              |

|    |                                                                         |        |      |         |    |            |
|----|-------------------------------------------------------------------------|--------|------|---------|----|------------|
|    | bisphosphate 3-kinase<br>catalytic subunit alpha                        |        |      |         |    |            |
| 4  | Proto-oncogene tyrosine-<br>protein kinase Src                          | SRC    | 4MXO | 2.105 Å | 10 | 0.08361207 |
| 5  | Probable ATP-dependent<br>RNA helicase DDX5                             | DDX5   | 3FE2 | 2.6 Å   | 14 | 0.09386843 |
| 6  | Hepatocyte growth factor<br>receptor                                    | c-Met  | 5EYD | 1.85 Å  | 0  | 0          |
| 7  | Prostaglandin G/H<br>synthase 2                                         | COX2   | 5KIR | 2.697 Å | 2  | 4.25E-04   |
| 8  | Neutrophil gelatinase-<br>associated lipocalin                          | LCN2   | 3DSZ | 2 Å     | 3  | 0.00454735 |
| 9  | Protein-glutamine<br>gamma-<br>glutamyltransferase 2                    | TGM2   | 4PYG | 2.8 Å   | 0  | 0          |
| 10 | Protein kinase C alpha                                                  | PRKCA  | 4RA4 | 2.63 Å  | 12 | 0.07004885 |
| 11 | Serine/threonine-protein<br>kinase mTOR                                 | mTOR   | 4JT5 | 3.45 Å  | 3  | 0.00282128 |
| 12 | Estrogen receptor                                                       | ESR1   | 5FQV | 1.74 Å  | 0  | 0          |
| 13 | Disintegrin and<br>metalloproteinase<br>domain-containing<br>protein 17 | ADAM17 | 3LEA | 2 Å     | 8  | 0.01679009 |
| 14 | Receptor tyrosine-protein<br>kinase erbB-2                              | ERBB2  | 3PP0 | 2.25 Å  | 0  | 0          |
| 15 | Tumor Protein P53                                                       | TP53   | 5G4O | 1.48 Å  | 0  | 0          |
| 16 | Epidermal Growth Factor<br>Receptor                                     | EGFR   | 5JEB | 3.298 Å | 3  | 0.00394928 |
| 17 | Cadherin 1                                                              | CDH1   | 4ZTE | 2.13 Å  | 5  | 0.02783261 |

|    |                                               |         |      |         |    |            |
|----|-----------------------------------------------|---------|------|---------|----|------------|
| 18 | Catenin Beta 1                                | CTNNB1  | 3TX7 | 2.76 Å  | 0  | 0          |
| 19 | Fibroblast Growth Factor Receptor 2           | FGFR2   | 5EG3 | 2.606 Å | 6  | 0.01547412 |
| 20 | Progesterone Receptor                         | PGR     | 1SR7 | 1.46 Å  | 0  | 0          |
| 21 | Prostaglandin-Endoperoxide Synthase 2         | PTGS2   | 5IKT | 2.451 Å | 3  | 0.00170749 |
| 22 | Erb-B2 Receptor Tyrosine Kinase 3             | ERBB3   | 6OP9 | 2.501 Å | 10 | 0.05911205 |
| 23 | Apoptosis regulator Bcl-2                     | BCL2    | 4LXD | 1.9 Å   | 26 | 0.2472     |
| 24 | Aromatase                                     | CYP19A1 | 3EQM | 2.9 Å   | 0  | 0          |
| 25 | Proto-oncogene c-Abl                          | ABL1    | 4ZOG | 2.3 Å   | 3  | 0.00661283 |
| 26 | Estrogen receptor beta                        | ESR2    | 4ZI1 | 2.1 Å   | 0  | 0          |
| 27 | Vascular endothelial growth factor receptor 2 | KDR     | 3EWH | 1.6 Å   | 0  | 0          |
| 28 | Cytochrome P450 11B1                          | CYP11B1 | 6M7X | 2.095 Å | 0  | 0          |
| 29 | PI3K delta                                    | PIK3CD  | 5T8F | 2.91 Å  | 8  | 0.02876791 |
| 30 | Carbonic anhydrase IV                         | CA4     | 3F7B | 2.05 Å  | 4  | 0.00616844 |
| 31 | Carbonic anhydrase II                         | CA2     | 4PZH | 1.06 Å  | 1  | 0          |
| 32 | Urokinase-type plasminogen activator          | PLAU    | 1SQT | 1.9 Å   | 9  | 0.03517613 |
| 33 | DNA topoisomerase I                           | TOP1MT  | 1T8I | 3 Å     | 6  | 0.01743362 |
| 34 | Insulin receptor                              | INSR    | 5HHW | 1.79 Å  | 4  | 0.00569398 |
| 35 | FL cytokine receptor                          | FLT3    | 4XUF | 3.2 Å   |    |            |
| 36 | Protein kinase C gamma type                   | PRKCG   | 2UZP | 2 Å     | 1  | 0          |

|    |                                                            |         |      |         |    |            |
|----|------------------------------------------------------------|---------|------|---------|----|------------|
| 37 | Androgen receptor                                          | AR      | 5V8Q | 1.44 Å  | 0  | 0          |
| 38 | Mast/stem cell growth factor receptor                      | KIT     | 3G0E | 1.6 Å   | 0  | 0          |
| 39 | Tyrosine-protein kinase JAK2                               | JAK2    | 5UT6 | 1.645 Å | 2  | 0.00165432 |
| 40 | FL cytokine receptor                                       | FLT3    | 4RT7 | 3.1 Å   | 0  | 0          |
| 41 | Cyclin-dependent kinase 6                                  | CDK6    | 5L2T | 2.37 Å  | 3  | 0.00186753 |
| 42 | Dihydrofolate reductase                                    | DHFR    | 4QJC | 1.62 Å  | 9  | 0.02963539 |
| 43 | Urokinase plasminogen activator surface receptor           | PLAUR   | 3U74 | 2.39 Å  | 0  | 0          |
| 44 | Ephrin type-A receptor 2                                   | EPHA2   | 5IA5 | 1.776 Å | 0  | 0          |
| 45 | Dual specificity mitogen-activated protein kinase kinase 1 | MAP2K1  | 5EYM | 2.7 Å   | 0  | 0          |
| 46 | C-X-C chemokine receptor type 4                            | CXCR4   | 3OE9 | 3.1 Å   | 18 | 0.11203831 |
| 47 | Cathepsin D                                                | CTSD    | 4OD9 | 1.9 Å   | 9  | 0.03673176 |
| 48 | Ubiquitin-protein ligase E3 Mdm2                           | MDM2    | 5LAW | 1.64 Å  | 4  | 0.00974686 |
| 49 | Stromal cell-derived factor 1                              | CXCL12  | 4UAI | 1.9 Å   | 2  | 0.00127425 |
| 50 | Steryl-sulfatase                                           | STS     | 1P49 | 2.6 Å   | 0  | 0          |
| 51 | Cytochrome P450 2C19                                       | CYP2C19 | 4GQS | 2.87 Å  | 0  | 0          |
| 52 | Thymidine phosphorylase                                    | TYMP    | 1UOU | 2.11 Å  | 0  | 0          |
| 53 | Steroid hormone receptor ERR1                              | ESRRA   | 3K6P | 1.996 Å | 0  | 0          |

|    |                                    |      |      |        |   |            |
|----|------------------------------------|------|------|--------|---|------------|
|    | RAC-alpha                          |      |      |        |   |            |
| 54 | serine/threonine-protein<br>kinase | AKT1 | 4GV1 | 1.49 Å | 6 | 0.01464801 |

---

**Table S3 targets proteins and related signaling pathways**

| Protein names                         | Gene names | Protein codes | Related pathways                                   |
|---------------------------------------|------------|---------------|----------------------------------------------------|
|                                       |            |               | hsa01521 EGFR tyrosine kinase inhibitor resistance |
|                                       |            |               | hsa01522 Endocrine resistance                      |
|                                       |            |               | hsa04010 MAPK signaling pathway                    |
|                                       |            |               | hsa04014 Ras signaling pathway                     |
|                                       |            |               | hsa04015 Rap1 signaling pathway                    |
|                                       |            |               | hsa04066 HIF-1 signaling pathway                   |
| Insulin-like growth factor 1 receptor | IGF1R      | 3NW7          | hsa04068 FoxO signaling pathway                    |
|                                       |            |               | hsa04114 Oocyte meiosis                            |
|                                       |            |               | hsa04140 Autophagy - animal                        |
|                                       |            |               | hsa04144 Endocytosis                               |
|                                       |            |               | hsa04150 mTOR signaling pathway                    |
|                                       |            |               | hsa04151 PI3K-Akt signaling pathway                |
|                                       |            |               | hsa04152 AMPK signaling pathway                    |
|                                       |            |               | hsa04211 Longevity regulating pathway              |

---

|                    |       |                                                                   |
|--------------------|-------|-------------------------------------------------------------------|
|                    |       | hsa04213 Longevity regulating pathway - multiple species          |
|                    |       | hsa04510 Focal adhesion                                           |
|                    |       | hsa04520 Adherens junction                                        |
|                    |       | hsa04550 Signaling pathways regulating pluripotency of stem cells |
|                    |       | hsa04730 Long-term depression                                     |
|                    |       | hsa04913 Ovarian steroidogenesis                                  |
|                    |       | hsa04914 Progesterone-mediated oocyte maturation                  |
|                    |       | hsa05200 Pathways in cancer                                       |
|                    |       | hsa05202 Transcriptional misregulation in cancer                  |
|                    |       | hsa05205 Proteoglycans in cancer                                  |
|                    |       | hsa05214 Glioma                                                   |
|                    |       | hsa05215 Prostate cancer                                          |
|                    |       | hsa05218 Melanoma                                                 |
|                    |       | hsa05224 Breast cancer                                            |
|                    |       | hsa05225 Hepatocellular carcinoma                                 |
|                    |       | hsa04141 Protein processing in endoplasmic reticulum              |
|                    |       | hsa04151 PI3K-Akt signaling pathway                               |
|                    |       | hsa04217 Necroptosis                                              |
| Heat shock protein | HSP90 | hsa04612 Antigen processing and presentation                      |
| HSP 90-alpha       | AA1   | 4YKZ hsa04621 NOD-like receptor signaling pathway                 |
|                    |       | hsa04657 IL-17 signaling pathway                                  |
|                    |       | hsa04659 Th17 cell differentiation                                |
|                    |       | hsa04914 Progesterone-mediated oocyte maturation                  |



|                             |                                                    |
|-----------------------------|----------------------------------------------------|
|                             | hsa04915 Estrogen signaling pathway                |
|                             | hsa05200 Pathways in cancer                        |
|                             | hsa05215 Prostate cancer                           |
|                             | hsa05418 Fluid shear stress and atherosclerosis    |
|                             | hsa00562 Inositol phosphate metabolism             |
|                             | hsa01100 Metabolic pathways                        |
|                             | hsa01521 EGFR tyrosine kinase inhibitor resistance |
|                             | hsa01522 Endocrine resistance                      |
|                             | hsa01524 Platinum drug resistance                  |
|                             | hsa04012 ErbB signaling pathway                    |
|                             | hsa04014 Ras signaling pathway                     |
|                             | hsa04015 Rap1 signaling pathway                    |
|                             | hsa04024 cAMP signaling pathway                    |
| Phosphatidylinosit          | hsa04062 Chemokine signaling pathway               |
| ol 4,5-                     | hsa04066 HIF-1 signaling pathway                   |
| bisphosphate 3- PIK3CA 4JPS | hsa04068 FoxO signaling pathway                    |
| kinase catalytic            | hsa04070 Phosphatidylinositol signaling system     |
| subunit alpha               | hsa04071 Sphingolipid signaling pathway            |
|                             | hsa04072 Phospholipase D signaling pathway         |
|                             | hsa04140 Autophagy - animal                        |
|                             | hsa04150 mTOR signaling pathway                    |
|                             | hsa04151 PI3K-Akt signaling pathway                |
|                             | hsa04152 AMPK signaling pathway                    |
|                             | hsa04210 Apoptosis                                 |

hsa04211 Longevity regulating pathway

hsa04213 Longevity regulating pathway - multiple species

hsa04218 Cellular senescence

hsa04360 Axon guidance

hsa04370 VEGF signaling pathway

hsa04380 Osteoclast differentiation

hsa04510 Focal adhesion

hsa04550 Signaling pathways regulating pluripotency of stem cells

hsa04611 Platelet activation

hsa04620 Toll-like receptor signaling pathway

hsa04625 C-type lectin receptor signaling pathway

hsa04630 Jak-STAT signaling pathway

hsa04650 Natural killer cell mediated cytotoxicity

hsa04660 T cell receptor signaling pathway

hsa04662 B cell receptor signaling pathway

hsa04664 Fc epsilon RI signaling pathway

hsa04666 Fc gamma R-mediated phagocytosis

hsa04668 TNF signaling pathway

hsa04670 Leukocyte transendothelial migration

hsa04722 Neurotrophin signaling pathway

hsa04725 Cholinergic synapse

hsa04750 Inflammatory mediator regulation of TRP channels

hsa04810 Regulation of actin cytoskeleton

hsa04910 Insulin signaling pathway

hsa04914 Progesterone-mediated oocyte maturation

hsa04915 Estrogen signaling pathway

hsa04917 Prolactin signaling pathway

hsa04919 Thyroid hormone signaling pathway

hsa04923 Regulation of lipolysis in adipocytes

hsa04926 Relaxin signaling pathway

hsa04929 GnRH secretion

hsa04930 Type II diabetes mellitus

hsa04931 Insulin resistance

hsa04932 Non-alcoholic fatty liver disease (NAFLD)

hsa04933 AGE-RAGE signaling pathway in diabetic complications

hsa04960 Aldosterone-regulated sodium reabsorption

hsa04973 Carbohydrate digestion and absorption

hsa05100 Bacterial invasion of epithelial cells

hsa05135 Yersinia infection

hsa05142 Chagas disease (American trypanosomiasis)

hsa05146 Amoebiasis

hsa05160 Hepatitis C

hsa05161 Hepatitis B

hsa05162 Measles

hsa05164 Influenza A

hsa05165 Human papillomavirus infection

hsa05166 Human T-cell leukemia virus 1 infection

hsa05167 Kaposi sarcoma-associated herpesvirus infection

hsa05168 Herpes simplex virus 1 infection

hsa05169 Epstein-Barr virus infection

hsa05170 Human immunodeficiency virus 1 infection

hsa05200 Pathways in cancer

hsa05203 Viral carcinogenesis

hsa05205 Proteoglycans in cancer

hsa05206 MicroRNAs in cancer

hsa05210 Colorectal cancer

hsa05211 Renal cell carcinoma

hsa05212 Pancreatic cancer

hsa05213 Endometrial cancer

hsa05214 Glioma

hsa05215 Prostate cancer

hsa05218 Melanoma

hsa05220 Chronic myeloid leukemia

hsa05221 Acute myeloid leukemia

hsa05222 Small cell lung cancer

hsa05223 Non-small cell lung cancer

hsa05224 Breast cancer

hsa05225 Hepatocellular carcinoma

hsa05226 Gastric cancer

hsa05230 Central carbon metabolism in cancer

hsa05231 Choline metabolism in cancer

hsa05235 PD-L1 expression and PD-1 checkpoint pathway in cancer

hsa05418 Fluid shear stress and atherosclerosis

hsa01521 EGFR tyrosine kinase inhibitor resistance

hsa01522 Endocrine resistance

hsa04012 ErbB signaling pathway

hsa04015 Rap1 signaling pathway

hsa04062 Chemokine signaling pathway

hsa04137 Mitophagy - animal

hsa04144 Endocytosis

hsa04360 Axon guidance

hsa04370 VEGF signaling pathway

hsa04510 Focal adhesion

hsa04520 Adherens junction

Proto-oncogene  
tyrosine-protein  
kinase Src    SRC    4MXO    hsa04530 Tight junction

hsa04540 Gap junction

hsa04611 Platelet activation

hsa04625 C-type lectin receptor signaling pathway

hsa04727 GABAergic synapse

hsa04750 Inflammatory mediator regulation of TRP channels

hsa04810 Regulation of actin cytoskeleton

hsa04912 GnRH signaling pathway

hsa04915 Estrogen signaling pathway

hsa04917 Prolactin signaling pathway

hsa04919 Thyroid hormone signaling pathway

hsa04921 Oxytocin signaling pathway

|                                          |      |      |                                                                     |
|------------------------------------------|------|------|---------------------------------------------------------------------|
|                                          |      |      | hsa04926 Relaxin signaling pathway                                  |
|                                          |      |      | hsa05100 Bacterial invasion of epithelial cells                     |
|                                          |      |      | hsa05120 Epithelial cell signaling in Helicobacter pylori infection |
|                                          |      |      | hsa05131 Shigellosis                                                |
|                                          |      |      | hsa05135 Yersinia infection                                         |
|                                          |      |      | hsa05152 Tuberculosis                                               |
|                                          |      |      | hsa05161 Hepatitis B                                                |
|                                          |      |      | hsa05167 Kaposi sarcoma-associated herpesvirus infection            |
|                                          |      |      | hsa05168 Herpes simplex virus 1 infection                           |
|                                          |      |      | hsa05203 Viral carcinogenesis                                       |
|                                          |      |      | hsa05205 Proteoglycans in cancer                                    |
|                                          |      |      | hsa05219 Bladder cancer                                             |
|                                          |      |      | hsa05418 Fluid shear stress and atherosclerosis                     |
| Probable ATP-dependent RNA helicase DDX5 | DDX5 | 3FE2 | hsa03040 Spliceosome                                                |
|                                          |      |      | hsa05205 Proteoglycans in cancer                                    |
|                                          |      |      | hsa00590 Arachidonic acid metabolism                                |
|                                          |      |      | hsa01100 Metabolic pathways                                         |
|                                          |      |      | hsa04064 NF-kappa B signaling pathway                               |
| Prostaglandin G/H synthase 2             | COX2 | 5KIR | hsa04370 VEGF signaling pathway                                     |
|                                          |      |      | hsa04625 C-type lectin receptor signaling pathway                   |
|                                          |      |      | hsa04657 IL-17 signaling pathway                                    |
|                                          |      |      | hsa04668 TNF signaling pathway                                      |
|                                          |      |      | hsa04723 Retrograde endocannabinoid signaling                       |

|                                                      |           |                                                          |
|------------------------------------------------------|-----------|----------------------------------------------------------|
|                                                      |           | hsa04726 Serotonergic synapse                            |
|                                                      |           | hsa04913 Ovarian steroidogenesis                         |
|                                                      |           | hsa04921 Oxytocin signaling pathway                      |
|                                                      |           | hsa04923 Regulation of lipolysis in adipocytes           |
|                                                      |           | hsa05140 Leishmaniasis                                   |
|                                                      |           | hsa05163 Human cytomegalovirus infection                 |
|                                                      |           | hsa05165 Human papillomavirus infection                  |
|                                                      |           | hsa05167 Kaposi sarcoma-associated herpesvirus infection |
|                                                      |           | hsa05200 Pathways in cancer                              |
|                                                      |           | hsa05204 Chemical carcinogenesis                         |
|                                                      |           | hsa05206 MicroRNAs in cancer                             |
|                                                      |           | hsa05222 Small cell lung cancer                          |
| Neutrophil<br>gelatinase-<br>associated<br>lipocalin | LCN2 3DSZ | hsa04657 IL-17 signaling pathway                         |
|                                                      |           | hsa04621 NOD-like receptor signaling pathway             |
|                                                      |           | hsa01521 EGFR tyrosine kinase inhibitor resistance       |
|                                                      |           | hsa04010 MAPK signaling pathway                          |
|                                                      |           | hsa04012 ErbB signaling pathway                          |
|                                                      |           | hsa04014 Ras signaling pathway                           |
| Protein kinase C<br>alpha type                       | 4RA4      | hsa04015 Rap1 signaling pathway                          |
|                                                      |           | hsa04020 Calcium signaling pathway                       |
|                                                      |           | hsa04066 HIF-1 signaling pathway                         |
|                                                      |           | hsa04070 Phosphatidylinositol signaling system           |
|                                                      | PRKCA     | hsa04071 Sphingolipid signaling pathway                  |

hsa04072 Phospholipase D signaling pathway

hsa04150 mTOR signaling pathway

hsa04151 PI3K-Akt signaling pathway

hsa04261 Adrenergic signaling in cardiomyocytes

hsa04270 Vascular smooth muscle contraction

hsa04310 Wnt signaling pathway

hsa04360 Axon guidance

hsa04370 VEGF signaling pathway

hsa04510 Focal adhesion

hsa04540 Gap junction

hsa04650 Natural killer cell mediated cytotoxicity

hsa04664 Fc epsilon RI signaling pathway

hsa04666 Fc gamma R-mediated phagocytosis

hsa04670 Leukocyte transendothelial migration

hsa04713 Circadian entrainment

hsa04720 Long-term potentiation

hsa04723 Retrograde endocannabinoid signaling

hsa04724 Glutamatergic synapse

hsa04725 Cholinergic synapse

hsa04726 Serotonergic synapse

hsa04727 GABAergic synapse

hsa04728 Dopaminergic synapse

hsa04730 Long-term depression

hsa04750 Inflammatory mediator regulation of TRP channels



hsa04911 Insulin secretion

hsa04912 GnRH signaling pathway

hsa04916 Melanogenesis

hsa04918 Thyroid hormone synthesis

hsa04919 Thyroid hormone signaling pathway

hsa04921 Oxytocin signaling pathway

hsa04925 Aldosterone synthesis and secretion

hsa04926 Relaxin signaling pathway

hsa04928 Parathyroid hormone synthesis, secretion and action

hsa04929 GnRH secretion

hsa04933 AGE-RAGE signaling pathway in diabetic complications

hsa04960 Aldosterone-regulated sodium reabsorption

hsa04961 Endocrine and other factor-regulated calcium reabsorption

hsa04970 Salivary secretion

hsa04971 Gastric acid secretion

hsa04972 Pancreatic secretion

hsa05031 Amphetamine addiction

hsa05032 Morphine addiction

hsa05110 Vibrio cholerae infection

hsa05143 African trypanosomiasis

hsa05146 Amoebiasis

hsa05161 Hepatitis B

hsa05164 Influenza A

|                   |      |                                                          |
|-------------------|------|----------------------------------------------------------|
|                   |      | hsa05170 Human immunodeficiency virus 1 infection        |
|                   |      | hsa05200 Pathways in cancer                              |
|                   |      | hsa05205 Proteoglycans in cancer                         |
|                   |      | hsa05206 MicroRNAs in cancer                             |
|                   |      | hsa05214 Glioma                                          |
|                   |      | hsa05223 Non-small cell lung cancer                      |
|                   |      | hsa05225 Hepatocellular carcinoma                        |
|                   |      | hsa05231 Choline metabolism in cancer                    |
|                   |      | hsa01521 EGFR tyrosine kinase inhibitor resistance       |
|                   |      | hsa01522 Endocrine resistance                            |
|                   |      | hsa04012 ErbB signaling pathway                          |
|                   |      | hsa04066 HIF-1 signaling pathway                         |
|                   |      | hsa04072 Phospholipase D signaling pathway               |
|                   |      | hsa04136 Autophagy - other                               |
|                   |      | hsa04140 Autophagy - animal                              |
| Serine/threonine- |      | hsa04150 mTOR signaling pathway                          |
| protein kinase    | mTOR | 4JT5                                                     |
| mTOR              |      | hsa04151 PI3K-Akt signaling pathway                      |
|                   |      | hsa04152 AMPK signaling pathway                          |
|                   |      | hsa04211 Longevity regulating pathway                    |
|                   |      | hsa04213 Longevity regulating pathway - multiple species |
|                   |      | hsa04218 Cellular senescence                             |
|                   |      | hsa04371 Apelin signaling pathway                        |
|                   |      | hsa04630 Jak-STAT signaling pathway                      |
|                   |      | hsa04659 Th17 cell differentiation                       |

hsa04714 Thermogenesis

hsa04910 Insulin signaling pathway

hsa04919 Thyroid hormone signaling pathway

hsa04920 Adipocytokine signaling pathway

hsa04930 Type II diabetes mellitus

hsa04931 Insulin resistance

hsa05165 Human papillomavirus infection

hsa05167 Kaposi sarcoma-associated herpesvirus infection

hsa05168 Herpes simplex virus 1 infection

hsa05170 Human immunodeficiency virus 1 infection

hsa05200 Pathways in cancer

hsa05205 Proteoglycans in cancer

hsa05206 MicroRNAs in cancer

hsa05210 Colorectal cancer

hsa05212 Pancreatic cancer

hsa05214 Glioma

hsa05215 Prostate cancer

hsa05221 Acute myeloid leukemia

hsa05224 Breast cancer

hsa05225 Hepatocellular carcinoma

hsa05226 Gastric cancer

hsa05230 Central carbon metabolism in cancer

hsa05231 Choline metabolism in cancer

hsa05235 PD-L1 expression and PD-1 checkpoint pathway in cancer

|                                                                |         |      |                                                                     |
|----------------------------------------------------------------|---------|------|---------------------------------------------------------------------|
| Disintegrin and metalloproteinase domain-containing protein 17 | ADAM 17 | 3LEA | hsa04330 Notch signaling pathway                                    |
|                                                                |         |      | hsa05010 Alzheimer disease                                          |
|                                                                |         |      | hsa05120 Epithelial cell signaling in Helicobacter pylori infection |
|                                                                |         |      | hsa01521 EGFR tyrosine kinase inhibitor resistance                  |
|                                                                |         |      | hsa01522 Endocrine resistance                                       |
|                                                                |         |      | hsa04010 MAPK signaling pathway                                     |
|                                                                |         |      | hsa04012 ErbB signaling pathway                                     |
|                                                                |         |      | hsa04014 Ras signaling pathway                                      |
|                                                                |         |      | hsa04015 Rap1 signaling pathway                                     |
|                                                                |         |      | hsa04020 Calcium signaling pathway                                  |
|                                                                |         |      | hsa04066 HIF-1 signaling pathway                                    |
|                                                                |         |      | hsa04068 FoxO signaling pathway                                     |
|                                                                |         |      | hsa04072 Phospholipase D signaling pathway                          |
|                                                                |         |      | Epidermal Growth Factor Receptor                                    |
| hsa04151 PI3K-Akt signaling pathway                            |         |      |                                                                     |
| hsa04510 Focal adhesion                                        |         |      |                                                                     |
| hsa04520 Adherens junction                                     |         |      |                                                                     |
| hsa04540 Gap junction                                          |         |      |                                                                     |
| hsa04630 Jak-STAT signaling pathway                            |         |      |                                                                     |
| hsa04810 Regulation of actin cytoskeleton                      |         |      |                                                                     |
| hsa04912 GnRH signaling pathway                                |         |      |                                                                     |
| hsa04915 Estrogen signaling pathway                            |         |      |                                                                     |
| hsa04921 Oxytocin signaling pathway                            |         |      |                                                                     |
| hsa04926 Relaxin signaling pathway                             |         |      |                                                                     |

hsa04928 Parathyroid hormone synthesis, secretion and action

hsa04934 Cushing syndrome

hsa05120 Epithelial cell signaling in Helicobacter pylori infection

hsa05160 Hepatitis C

hsa05165 Human papillomavirus infection

hsa05200 Pathways in cancer

hsa05205 Proteoglycans in cancer

hsa05206 MicroRNAs in cancer

hsa05210 Colorectal cancer

hsa05212 Pancreatic cancer

hsa05213 Endometrial cancer

hsa05214 Glioma

hsa05215 Prostate cancer

hsa05218 Melanoma

hsa05219 Bladder cancer

hsa05223 Non-small cell lung cancer

hsa05224 Breast cancer

hsa05225 Hepatocellular carcinoma

hsa05226 Gastric cancer

hsa05230 Central carbon metabolism in cancer

hsa05231 Choline metabolism in cancer

hsa05235 PD-L1 expression and PD-1 checkpoint pathway in cancer

Cadherin 1    CDH1    4ZTE    hsa04015 Rap1 signaling pathway

hsa04371 Apelin signaling pathway

hsa04390 Hippo signaling pathway

hsa04514 Cell adhesion molecules (CAMs)

hsa04520 Adherens junction

hsa05100 Bacterial invasion of epithelial cells

hsa05200 Pathways in cancer

hsa05213 Endometrial cancer

hsa05216 Thyroid cancer

hsa05218 Melanoma

hsa05219 Bladder cancer

hsa05226 Gastric cancer

hsa01521 EGFR tyrosine kinase inhibitor resistance

hsa04010 MAPK signaling pathway

hsa04014 Ras signaling pathway

hsa04015 Rap1 signaling pathway

hsa04144 Endocytosis

hsa04151 PI3K-Akt signaling pathway

Fibroblast Growth Factor Receptor 2    FGFR2    5EG3    hsa04550 Signaling pathways regulating pluripotency of stem cells

hsa04810 Regulation of actin cytoskeleton

hsa05200 Pathways in cancer

hsa05215 Prostate cancer

hsa05226 Gastric cancer

hsa05230 Central carbon metabolism in cancer

Prostaglandin-    PTGS2    5IKT    hsa00590 Arachidonic acid metabolism

Endoperoxide  
Synthase 2

hsa01100 Metabolic pathways  
hsa04064 NF-kappa B signaling pathway  
hsa04370 VEGF signaling pathway  
hsa04625 C-type lectin receptor signaling pathway  
hsa04657 IL-17 signaling pathway  
hsa04668 TNF signaling pathway  
hsa04723 Retrograde endocannabinoid signaling  
hsa04726 Serotonergic synapse  
hsa04913 Ovarian steroidogenesis  
hsa04921 Oxytocin signaling pathway  
hsa04923 Regulation of lipolysis in adipocytes  
hsa05140 Leishmaniasis  
hsa05165 Human papillomavirus infection  
hsa05167 Kaposi sarcoma-associated herpesvirus infection  
hsa05200 Pathways in cancer  
hsa05204 Chemical carcinogenesis  
hsa05206 MicroRNAs in cancer  
hsa05222 Small cell lung cancer  
hsa01521 EGFR tyrosine kinase inhibitor resistance  
hsa04010 MAPK signaling pathway  
hsa04012 ErbB signaling pathway  
hsa04020 Calcium signaling pathway  
hsa04151 PI3K-Akt signaling pathway  
hsa05205 Proteoglycans in cancer

Erb-B2 Receptor  
Tyrosine Kinase 3

ERBB3 6OP9

hsa05206 MicroRNAs in cancer

hsa01521 EGFR tyrosine kinase inhibitor resistance

hsa01522 Endocrine resistance

hsa01524 Platinum drug resistance

hsa04064 NF-kappa B signaling pathway

hsa04066 HIF-1 signaling pathway

hsa04071 Sphingolipid signaling pathway

hsa04115 p53 signaling pathway

hsa04140 Autophagy - animal

hsa04141 Protein processing in endoplasmic reticulum

hsa04151 PI3K-Akt signaling pathway

hsa04210 Apoptosis

Apoptosis  
regulator Bcl-2

BCL2 4LXD

hsa04215 Apoptosis - multiple species

hsa04217 Necroptosis

hsa04261 Adrenergic signaling in cardiomyocytes

hsa04340 Hedgehog signaling pathway

hsa04510 Focal adhesion

hsa04621 NOD-like receptor signaling pathway

hsa04630 Jak-STAT signaling pathway

hsa04722 Neurotrophin signaling pathway

hsa04725 Cholinergic synapse

hsa04915 Estrogen signaling pathway

hsa04928 Parathyroid hormone synthesis, secretion and action

hsa04933 AGE-RAGE signaling pathway in diabetic complications



hsa05014 Amyotrophic lateral sclerosis (ALS)

hsa05145 Toxoplasmosis

hsa05152 Tuberculosis

hsa05161 Hepatitis B

hsa05162 Measles

hsa05168 Herpes simplex virus 1 infection

hsa05169 Epstein-Barr virus infection

hsa05170 Human immunodeficiency virus 1 infection

hsa05200 Pathways in cancer

hsa05206 MicroRNAs in cancer

hsa05210 Colorectal cancer

hsa05215 Prostate cancer

hsa05222 Small cell lung cancer

hsa05226 Gastric cancer

hsa05418 Fluid shear stress and atherosclerosis

hsa04012 ErbB signaling pathway

hsa04014 Ras signaling pathway

hsa04110 Cell cycle

hsa04360 Axon guidance

Proto-oncogene c-ABL1 4ZOG hsa04722 Neurotrophin signaling pathway

Abl

hsa05130 Pathogenic Escherichia coli infection

hsa05131 Shigellosis

hsa05200 Pathways in cancer

hsa05206 MicroRNAs in cancer

hsa05220 Chronic myeloid leukemia

hsa05416 Viral myocarditis

hsa00562 Inositol phosphate metabolism

hsa01100 Metabolic pathways

hsa01521 EGFR tyrosine kinase inhibitor resistance

hsa01522 Endocrine resistance

hsa01524 Platinum drug resistance

hsa04012 ErbB signaling pathway

hsa04014 Ras signaling pathway

hsa04015 Rap1 signaling pathway

hsa04024 cAMP signaling pathway

hsa04062 Chemokine signaling pathway

hsa04066 HIF-1 signaling pathway

PI3K delta    PIK3CD    5T8F    hsa04068 FoxO signaling pathway

hsa04070 Phosphatidylinositol signaling system

hsa04071 Sphingolipid signaling pathway

hsa04072 Phospholipase D signaling pathway

hsa04140 Autophagy - animal

hsa04150 mTOR signaling pathway

hsa04151 PI3K-Akt signaling pathway

hsa04152 AMPK signaling pathway

hsa04210 Apoptosis

hsa04211 Longevity regulating pathway

hsa04213 Longevity regulating pathway - multiple species

hsa04218 Cellular senescence

hsa04360 Axon guidance

hsa04370 VEGF signaling pathway

hsa04380 Osteoclast differentiation

hsa04510 Focal adhesion

hsa04550 Signaling pathways regulating pluripotency of stem cells

hsa04611 Platelet activation

hsa04620 Toll-like receptor signaling pathway

hsa04625 C-type lectin receptor signaling pathway

hsa04630 Jak-STAT signaling pathway

hsa04650 Natural killer cell mediated cytotoxicity

hsa04660 T cell receptor signaling pathway

hsa04662 B cell receptor signaling pathway

hsa04664 Fc epsilon RI signaling pathway

hsa04666 Fc gamma R-mediated phagocytosis

hsa04668 TNF signaling pathway

hsa04670 Leukocyte transendothelial migration

hsa04722 Neurotrophin signaling pathway

hsa04725 Cholinergic synapse

hsa04750 Inflammatory mediator regulation of TRP channels

hsa04810 Regulation of actin cytoskeleton

hsa04910 Insulin signaling pathway

hsa04914 Progesterone-mediated oocyte maturation

hsa04915 Estrogen signaling pathway

hsa04917 Prolactin signaling pathway

hsa04919 Thyroid hormone signaling pathway

hsa04923 Regulation of lipolysis in adipocytes

hsa04926 Relaxin signaling pathway

hsa04929 GnRH secretion

hsa04930 Type II diabetes mellitus

hsa04931 Insulin resistance

hsa04932 Non-alcoholic fatty liver disease (NAFLD)

hsa04933 AGE-RAGE signaling pathway in diabetic complications

hsa04960 Aldosterone-regulated sodium reabsorption

hsa04973 Carbohydrate digestion and absorption

hsa05100 Bacterial invasion of epithelial cells

hsa05135 Yersinia infection

hsa05142 Chagas disease (American trypanosomiasis)

hsa05146 Amoebiasis

hsa05160 Hepatitis C

hsa05161 Hepatitis B

hsa05162 Measles

hsa05164 Influenza A

hsa05165 Human papillomavirus infection

hsa05166 Human T-cell leukemia virus 1 infection

hsa05167 Kaposi sarcoma-associated herpesvirus infection

hsa05168 Herpes simplex virus 1 infection

hsa05169 Epstein-Barr virus infection

hsa05170 Human immunodeficiency virus 1 infection

hsa05200 Pathways in cancer

hsa05203 Viral carcinogenesis

hsa05205 Proteoglycans in cancer

hsa05206 MicroRNAs in cancer

hsa05210 Colorectal cancer

hsa05211 Renal cell carcinoma

hsa05212 Pancreatic cancer

hsa05213 Endometrial cancer

hsa05214 Glioma

hsa05215 Prostate cancer

hsa05218 Melanoma

hsa05220 Chronic myeloid leukemia

hsa05221 Acute myeloid leukemia

hsa05222 Small cell lung cancer

hsa05223 Non-small cell lung cancer

hsa05224 Breast cancer

hsa05225 Hepatocellular carcinoma

hsa05226 Gastric cancer

hsa05230 Central carbon metabolism in cancer

hsa05231 Choline metabolism in cancer

hsa05235 PD-L1 expression and PD-1 checkpoint pathway in cancer

hsa05418 Fluid shear stress and atherosclerosis

Phosphatidylinosit PIK3CG 4WWO hsa00562 Inositol phosphate metabolism

|                                                              |      |      |                                                          |
|--------------------------------------------------------------|------|------|----------------------------------------------------------|
| ol 4,5-bisphosphate 3-kinase catalytic subunit gamma isoform |      |      | hsa01100 Metabolic pathways                              |
|                                                              |      |      | hsa04022 cGMP-PKG signaling pathway                      |
|                                                              |      |      | hsa04062 Chemokine signaling pathway                     |
|                                                              |      |      | hsa04072 Phospholipase D signaling pathway               |
|                                                              |      |      | hsa04151 PI3K-Akt signaling pathway                      |
|                                                              |      |      | hsa04261 Adrenergic signaling in cardiomyocytes          |
|                                                              |      |      | hsa04371 Apelin signaling pathway                        |
|                                                              |      |      | hsa04611 Platelet activation                             |
|                                                              |      |      | hsa04725 Cholinergic synapse                             |
|                                                              |      |      | hsa04921 Oxytocin signaling pathway                      |
|                                                              |      |      | hsa05145 Toxoplasmosis                                   |
|                                                              |      |      | hsa05167 Kaposi sarcoma-associated herpesvirus infection |
|                                                              |      |      | hsa00910 Nitrogen metabolism                             |
| Carbonic anhydrase IV                                        | CA4  | 3F7B | hsa01100 Metabolic pathways                              |
|                                                              |      |      | hsa04964 Proximal tubule bicarbonate reclamation         |
|                                                              |      |      | hsa00910 Nitrogen metabolism                             |
|                                                              |      |      | hsa01100 Metabolic pathways                              |
|                                                              |      |      | hsa04964 Proximal tubule bicarbonate reclamation         |
| Carbonic anhydrase II                                        | CA2  | 4PZH | hsa04966 Collecting duct acid secretion                  |
|                                                              |      |      | hsa04971 Gastric acid secretion                          |
|                                                              |      |      | hsa04972 Pancreatic secretion                            |
|                                                              |      |      | hsa04976 Bile secretion                                  |
| Urokinase-type plasminogen activator                         | PLAU | 1SQT | hsa04064 NF-kappa B signaling pathway                    |
|                                                              |      |      | hsa04610 Complement and coagulation cascades             |

|                  |       |      |          |                                                 |
|------------------|-------|------|----------|-------------------------------------------------|
|                  |       |      | hsa05202 | Transcriptional misregulation in cancer         |
|                  |       |      | hsa05205 | Proteoglycans in cancer                         |
|                  |       |      | hsa05206 | MicroRNAs in cancer                             |
|                  |       |      | hsa05215 | Prostate cancer                                 |
|                  |       |      | hsa03440 | Homologous recombination                        |
| DNA              | TOP1M |      | hsa03460 | Fanconi anemia pathway                          |
| topoisomerase I  | T     | 1T8I |          |                                                 |
|                  |       |      | hsa01524 | Platinum drug resistance                        |
|                  |       |      | hsa04010 | MAPK signaling pathway                          |
|                  |       |      | hsa04014 | Ras signaling pathway                           |
|                  |       |      | hsa04015 | Rap1 signaling pathway                          |
|                  |       |      | hsa04022 | cGMP-PKG signaling pathway                      |
|                  |       |      | hsa04066 | HIF-1 signaling pathway                         |
|                  |       |      | hsa04068 | FoxO signaling pathway                          |
|                  |       |      | hsa04072 | Phospholipase D signaling pathway               |
|                  |       |      | hsa04150 | mTOR signaling pathway                          |
| Insulin receptor | INSR  | 5HHW | hsa04151 | PI3K-Akt signaling pathway                      |
|                  |       |      | hsa04152 | AMPK signaling pathway                          |
|                  |       |      | hsa04211 | Longevity regulating pathway                    |
|                  |       |      | hsa04213 | Longevity regulating pathway - multiple species |
|                  |       |      | hsa04520 | Adherens junction                               |
|                  |       |      | hsa04910 | Insulin signaling pathway                       |
|                  |       |      | hsa04913 | Ovarian steroidogenesis                         |
|                  |       |      | hsa04923 | Regulation of lipolysis in adipocytes           |
|                  |       |      | hsa04930 | Type II diabetes mellitus                       |

hsa04931 Insulin resistance  
hsa04932 Non-alcoholic fatty liver disease (NAFLD)  
hsa04960 Aldosterone-regulated sodium reabsorption  
hsa01521 EGFR tyrosine kinase inhibitor resistance  
hsa04010 MAPK signaling pathway  
hsa04012 ErbB signaling pathway  
hsa04014 Ras signaling pathway  
hsa04015 Rap1 signaling pathway  
hsa04020 Calcium signaling pathway  
hsa04066 HIF-1 signaling pathway  
hsa04070 Phosphatidylinositol signaling system  
hsa04071 Sphingolipid signaling pathway  
hsa04150 mTOR signaling pathway  
hsa04270 Vascular smooth muscle contraction  
hsa04310 Wnt signaling pathway  
hsa04370 VEGF signaling pathway  
hsa04510 Focal adhesion  
hsa04540 Gap junction  
hsa04650 Natural killer cell mediated cytotoxicity  
hsa04666 Fc gamma R-mediated phagocytosis  
hsa04670 Leukocyte transendothelial migration  
hsa04713 Circadian entrainment  
hsa04720 Long-term potentiation  
hsa04723 Retrograde endocannabinoid signaling

Protein kinase C  
gamma type

PRKCG 2UZP



hsa04724 Glutamatergic synapse

hsa04725 Cholinergic synapse

hsa04726 Serotonergic synapse

hsa04727 GABAergic synapse

hsa04728 Dopaminergic synapse

hsa04730 Long-term depression

hsa04750 Inflammatory mediator regulation of TRP channels

hsa04911 Insulin secretion

hsa04916 Melanogenesis

hsa04918 Thyroid hormone synthesis

hsa04919 Thyroid hormone signaling pathway

hsa04921 Oxytocin signaling pathway

hsa04925 Aldosterone synthesis and secretion

hsa04928 Parathyroid hormone synthesis, secretion and action

hsa04929 GnRH secretion

hsa04960 Aldosterone-regulated sodium reabsorption

hsa04961 Endocrine and other factor-regulated calcium reabsorption

hsa04970 Salivary secretion

hsa04971 Gastric acid secretion

hsa04972 Pancreatic secretion

hsa05031 Amphetamine addiction

hsa05032 Morphine addiction

hsa05143 African trypanosomiasis

hsa05146 Amoebiasis

|                  |      |                                                                   |
|------------------|------|-------------------------------------------------------------------|
|                  |      | hsa05161 Hepatitis B                                              |
|                  |      | hsa05170 Human immunodeficiency virus 1 infection                 |
|                  |      | hsa05200 Pathways in cancer                                       |
|                  |      | hsa05205 Proteoglycans in cancer                                  |
|                  |      | hsa05206 MicroRNAs in cancer                                      |
|                  |      | hsa05214 Glioma                                                   |
|                  |      | hsa05223 Non-small cell lung cancer                               |
|                  |      | hsa05225 Hepatocellular carcinoma                                 |
|                  |      | hsa05231 Choline metabolism in cancer                             |
|                  |      | hsa01521 EGFR tyrosine kinase inhibitor resistance                |
|                  |      | hsa04062 Chemokine signaling pathway                              |
|                  |      | hsa04151 PI3K-Akt signaling pathway                               |
|                  |      | hsa04217 Necroptosis                                              |
|                  |      | hsa04550 Signaling pathways regulating pluripotency of stem cells |
|                  |      | hsa04630 Jak-STAT signaling pathway                               |
| Tyrosine-protein |      | hsa04658 Th1 and Th2 cell differentiation                         |
| kinase JAK2      | JAK2 | 5UT6                                                              |
|                  |      | hsa04659 Th17 cell differentiation                                |
|                  |      | hsa04725 Cholinergic synapse                                      |
|                  |      | hsa04917 Prolactin signaling pathway                              |
|                  |      | hsa04920 Adipocytokine signaling pathway                          |
|                  |      | hsa04933 AGE-RAGE signaling pathway in diabetic complications     |
|                  |      | hsa05140 Leishmaniasis                                            |
|                  |      | hsa05145 Toxoplasmosis                                            |

hsa05152 Tuberculosis

hsa05161 Hepatitis B

hsa05164 Influenza A

hsa05167 Kaposi sarcoma-associated herpesvirus infection

hsa05168 Herpes simplex virus 1 infection

hsa05200 Pathways in cancer

hsa05235 PD-L1 expression and PD-1 checkpoint pathway in cancer

hsa04110 Cell cycle

hsa04115 p53 signaling pathway

hsa04151 PI3K-Akt signaling pathway

hsa04218 Cellular senescence

hsa04934 Cushing syndrome

hsa05160 Hepatitis C

hsa05162 Measles

hsa05164 Influenza A

Cyclin-dependent  
kinase 6

CDK6

5L2T

hsa05165 Human papillomavirus infection

hsa05167 Kaposi sarcoma-associated herpesvirus infection

hsa05169 Epstein-Barr virus infection

hsa05200 Pathways in cancer

hsa05203 Viral carcinogenesis

hsa05206 MicroRNAs in cancer

hsa05212 Pancreatic cancer

hsa05214 Glioma

hsa05218 Melanoma



hsa04915 Estrogen signaling pathway

hsa05152 Tuberculosis

hsa01522 Endocrine resistance

hsa01524 Platinum drug resistance

hsa04068 FoxO signaling pathway

hsa04110 Cell cycle

hsa04115 p53 signaling pathway

hsa04120 Ubiquitin mediated proteolysis

hsa04144 Endocytosis

hsa04151 PI3K-Akt signaling pathway

hsa04218 Cellular senescence

hsa04625 C-type lectin receptor signaling pathway

Ubiquitin-protein  
ligase E3 Mdm2 MDM2 5LAW

hsa04919 Thyroid hormone signaling pathway

hsa05165 Human papillomavirus infection

hsa05169 Epstein-Barr virus infection

hsa05200 Pathways in cancer

hsa05202 Transcriptional misregulation in cancer

hsa05203 Viral carcinogenesis

hsa05205 Proteoglycans in cancer

hsa05206 MicroRNAs in cancer

hsa05214 Glioma

hsa05215 Prostate cancer

hsa05218 Melanoma

hsa05219 Bladder cancer

|                                           |            |      |                                                                        |
|-------------------------------------------|------------|------|------------------------------------------------------------------------|
|                                           |            |      | hsa05220 Chronic myeloid leukemia                                      |
|                                           |            |      | hsa04060 Cytokine-cytokine receptor interaction                        |
|                                           |            |      | hsa04061 Viral protein interaction with cytokine and cytokine receptor |
|                                           |            |      | hsa04062 Chemokine signaling pathway                                   |
|                                           |            |      | hsa04064 NF-kappa B signaling pathway                                  |
| Stromal cell-derived factor 1             | CXCL1<br>2 | 4UAI | hsa04360 Axon guidance                                                 |
|                                           |            |      | hsa04670 Leukocyte transendothelial migration                          |
|                                           |            |      | hsa04672 Intestinal immune network for IgA production                  |
|                                           |            |      | hsa04810 Regulation of actin cytoskeleton                              |
|                                           |            |      | hsa05200 Pathways in cancer                                            |
|                                           |            |      | hsa05323 Rheumatoid arthritis                                          |
|                                           |            |      | hsa01521 EGFR tyrosine kinase inhibitor resistance                     |
|                                           |            |      | hsa01522 Endocrine resistance                                          |
|                                           |            |      | hsa01524 Platinum drug resistance                                      |
|                                           |            |      | hsa04010 MAPK signaling pathway                                        |
|                                           |            |      | hsa04012 ErbB signaling pathway                                        |
|                                           |            |      | hsa04014 Ras signaling pathway                                         |
| RAC-alpha serine/threonine-protein kinase | AKT1       | 4GV1 | hsa04015 Rap1 signaling pathway                                        |
|                                           |            |      | hsa04022 cGMP-PKG signaling pathway                                    |
|                                           |            |      | hsa04024 cAMP signaling pathway                                        |
|                                           |            |      | hsa04062 Chemokine signaling pathway                                   |
|                                           |            |      | hsa04066 HIF-1 signaling pathway                                       |
|                                           |            |      | hsa04068 FoxO signaling pathway                                        |
|                                           |            |      | hsa04071 Sphingolipid signaling pathway                                |

---

hsa04072 Phospholipase D signaling pathway

hsa04140 Autophagy - animal

hsa04150 mTOR signaling pathway

hsa04151 PI3K-Akt signaling pathway

hsa04152 AMPK signaling pathway

hsa04210 Apoptosis

hsa04211 Longevity regulating pathway

hsa04213 Longevity regulating pathway - multiple species

hsa04218 Cellular senescence

hsa04261 Adrenergic signaling in cardiomyocytes

hsa04370 VEGF signaling pathway

hsa04371 Apelin signaling pathway

hsa04380 Osteoclast differentiation

hsa04510 Focal adhesion

hsa04550 Signaling pathways regulating pluripotency of stem cells

hsa04611 Platelet activation

hsa04620 Toll-like receptor signaling pathway

hsa04625 C-type lectin receptor signaling pathway

hsa04630 Jak-STAT signaling pathway

hsa04660 T cell receptor signaling pathway

hsa04662 B cell receptor signaling pathway

hsa04664 Fc epsilon RI signaling pathway

hsa04666 Fc gamma R-mediated phagocytosis

hsa04668 TNF signaling pathway

---

hsa04722 Neurotrophin signaling pathway

hsa04725 Cholinergic synapse

hsa04728 Dopaminergic synapse

hsa04910 Insulin signaling pathway

hsa04914 Progesterone-mediated oocyte maturation

hsa04915 Estrogen signaling pathway

hsa04917 Prolactin signaling pathway

hsa04919 Thyroid hormone signaling pathway

hsa04920 Adipocytokine signaling pathway

hsa04922 Glucagon signaling pathway

hsa04923 Regulation of lipolysis in adipocytes

hsa04926 Relaxin signaling pathway

hsa04929 GnRH secretion

hsa04931 Insulin resistance

hsa04932 Non-alcoholic fatty liver disease (NAFLD)

hsa04933 AGE-RAGE signaling pathway in diabetic complications

hsa04973 Carbohydrate digestion and absorption

hsa05135 Yersinia infection

hsa05142 Chagas disease (American trypanosomiasis)

hsa05145 Toxoplasmosis

hsa05152 Tuberculosis

hsa05160 Hepatitis C

hsa05161 Hepatitis B

hsa05162 Measles

---



hsa05164 Influenza A

hsa05165 Human papillomavirus infection

hsa05166 Human T-cell leukemia virus 1 infection

hsa05167 Kaposi sarcoma-associated herpesvirus infection

hsa05168 Herpes simplex virus 1 infection

hsa05169 Epstein-Barr virus infection

hsa05170 Human immunodeficiency virus 1 infection

hsa05200 Pathways in cancer

hsa05205 Proteoglycans in cancer

hsa05210 Colorectal cancer

hsa05211 Renal cell carcinoma

hsa05212 Pancreatic cancer

hsa05213 Endometrial cancer

hsa05214 Glioma

hsa05215 Prostate cancer

hsa05218 Melanoma

hsa05220 Chronic myeloid leukemia

hsa05221 Acute myeloid leukemia

hsa05222 Small cell lung cancer

hsa05223 Non-small cell lung cancer

hsa05224 Breast cancer

hsa05225 Hepatocellular carcinoma

hsa05226 Gastric cancer

hsa05230 Central carbon metabolism in cancer

---

hsa05231 Choline metabolism in cancer

hsa05235 PD-L1 expression and PD-1 checkpoint pathway in cancer

hsa05418 Fluid shear stress and atherosclerosis

---
